# Supplementary material for: Discontinuation of follow-up care for young people with complex chronic conditions: conceptual definitions and operational components
Source: PubMed Central journal article supplement (PMC8672472; doi:10.1186/s12913-021-07335-x), 2021-12-15
Supplement: 12913_2021_7335_MOESM1_ESM.pdf [file 12913_2021_7335_MOESM1_ESM.pdf]

**I consent to answer the questions below**

Please, link the five different conceptual definitions to suitable terms. Select a term for each definition, using the drop-down lists.

Please, feel free to write down any ideas, thoughts or comments to your answers.

**Terms**

**Conceptual definitions for five types of discontinuation of care**

**Untraceability**

**No show or not being seen for a clinic visit within a defined time period and within a defined context**

Comments:

**Gap in care**

**Attending a clinic visit within a defined time period and within a defined context**

Comments:

**Unsuccessful transfer**

**A defined time interval between clinic visits within a defined context**

Comments:

**Lost to follow-up**

**Not attending a clinic visit within a defined context after transfer**

Comments:

**Retention in care**

**Failure to make contact due to lack of information**

Comments:

If you have further comments, please write them here:
